# Supplementary material for: Embryonic development of the moon jellyfish Aurelia aurita (Cnidaria, Scyphozoa): another variant on the theme of invagination
Source: PeerJ. 2022 May 18;10:e13361. doi: 10.7717/peerj.13361 (PMC9123889; doi:10.7717/peerj.13361)
Supplement: Data S1 [file peerj-10-13361-s001.xls]

## Sheet: Measurement Details
Measurement #	Oocyte diameter (micrometres)
1	181.179
2	146.531
3	153.427
4	147.894
5	163.325
6	171.524
7	165.837
8	162.057
9	185.369
10	187.851
11	159.961
12	155.297
13	161.065
14	155.183
15	153.921
16	152.224
17	163.164
18	165.787
19	169.057
20	173.918
21	180.78
22	165.248
23	168.457
24	165.288
25	169.727
26	168.44
27	160.546
28	155.231
29	154.45
30	142.416
31	166.396
32	169.079
33	167.682
34	171.584
35	153.573
36	172.89
37	165.175
38	155.81
39	156.973
40	160.692
41	169.373
42	157.664
43	171.524
44	148.204
45	176.311
46	169.096
47	164.788
48	144.092
49	182.684
50	183.932
51	182.684
52	172.592
53	169.373
54	164.691
55	159.344
56	162.963
57	139.631
58	135.576
59	150.732
60	163.532
61	148.886
62	150.857
63	166.824
64	167.088
65	174.106
66	161.733
