# Supplementary material for: Embryonic development of the moon jellyfish Aurelia aurita (Cnidaria, Scyphozoa): another variant on the theme of invagination
Source: PeerJ. 2022 May 18;10:e13361. doi: 10.7717/peerj.13361 (PMC9123889; doi:10.7717/peerj.13361)
Supplement: Data S2 [file peerj-10-13361-s002.xls]

## Sheet: Measurement Details
Measurement #		Oocyte diameter (micrometres)
1		153.4
2		155.557
3		149.42
4		171.943
5		154.52
6		159.68
7		215.033
8		140.382
9		156.017
10		152.321
11		154.239
12		154.489
13		161.352
14		167.953
15		159.51
16		150.402
17		128.139
18		144.068
19		151.579
20		170.311
21		157.856
22		156.713
23		171.923
24		164.717
25		121.606
26		111.659
27		152.372
28		133.413
29		130.583
30		131.874
31		151.685
32		158.765
33		144.068
34		133.745
35		140.925
36		131.981
37		168.735
38		139.819
39		165.991
40		147.304
41		162.578
42		158.712
43		211.195
44		163.547
45		146.895
46		157.945
47		207.913
48		175.514
49		155.314
50		164.625
51		154.384
52		172.872
53		149.586
54		158.142
55		199.123
56		154.749
57		206.286
58		171.479
59		155.574
60		152.427
61		147.425
62		152.495
63		193.739
64		159.28
65		153.798
66		167.504
67		158.052
68		167.369
69		175.616
70		156.057
71		155.071
72		150.926
73		161.369
74		168.847
75		155.314
76		121.467
77		132.33
78		139.745
79		141.238
80		158.195
81		163.386
82		147.559
83		160.246
84		147.4
85		154
86		146.169
87		144.068
88		155.405
89		169.225
90		167.386
91		167.723
92		155.023
93		163.248
94		160.832
95		161.072
96		222.253
97		171.764
98		157.061
99		146.811
100		150.677
101		149.806
