# Supplementary material for: Embryonic development of the moon jellyfish Aurelia aurita (Cnidaria, Scyphozoa): another variant on the theme of invagination
Source: PeerJ. 2022 May 18;10:e13361. doi: 10.7717/peerj.13361 (PMC9123889; doi:10.7717/peerj.13361)
Supplement: Data S3 [file peerj-10-13361-s003.xlsx]

## Sheet: Лист1
Aurelia aurita			Nematostella vectensis
Embryo #	Number of presumptive endodermal cells		Embryo #	Number of presumptive endodermal cells
1	14		1	285
2	29		2	266
3	15		3	227
4	16		4	255
5	20		5	279
6	15		6	201
7	20		7	267
8	16		8	285
9	16		9	215
10	14		10	295
min	14		min	201
max	29		max	295
Mean (average)	17.5		Mean (average)	237.041
Standard deviation	4.57651		Standard deviation	32.4525
