# Supplementary material for: Embryonic development of the moon jellyfish Aurelia aurita (Cnidaria, Scyphozoa): another variant on the theme of invagination
Source: PeerJ. 2022 May 18;10:e13361. doi: 10.7717/peerj.13361 (PMC9123889; doi:10.7717/peerj.13361)
Supplement: Data S4 — Aurelia aurita planulae measurements (planula length (micrometers)(L), planula width (micrometers) (W), and planula length / planula width ratio (LW)) from two medusae. AVG - average, SD - standard deviation, N - sample size (number of measurements) [file peerj-10-13361-s004.xls]

## Sheet: Measurement Details
	Measurement #	Planula length (micrometers) (L)	Planula width (micrometers) (W)	L/W
	1	232.719	121.176	1.92051
	2	192.747	121.17	1.59072
	3	249.355	129.993	1.91822
	4	220.602	133.931	1.64714
	5	257.859	127.976	2.0149
	6	212.686	119.689	1.77699
	7	282.11	119.26	2.3655
	8	242.948	125.981	1.92845
	9	235.251	128.376	1.83251
	10	209.715	127.371	1.64649
	11	226.804	122.301	1.85447
	12	207.547	130.44	1.59113
	13	224.668	127.707	1.75925
	14	270.884	134.188	2.0187
	15	205.803	119.689	1.71948
	16	246.137	111.76	2.20236
	17	221.43	134.853	1.64201
	18	205.502	123.942	1.65805
	19	230.522	121.346	1.8997
	20	249.315	124.269	2.00626
	21	249.315	129.663	1.92279
	22	256.591	120.059	2.1372
	23	219.475	125.25	1.7523
	24	218.304	121.069	1.80315
	25	231.397	121.264	1.9082
	26	203.21	119.08	1.7065
	27	256.734	132.466	1.93812
	28	223.302	129.006	1.73094
	29	214.296	127.377	1.68238
	30	249.561	125.689	1.98554
	31	274.794	146.719	1.87293
	32	225.505	125.981	1.78999
	33	186.61	129.356	1.44261
	34	212.992	121.397	1.75451
	35	263.985	127.371	2.07257
	36	251.577	130.375	1.92963
	37	238.866	132.743	1.79947
	38	236.888	125.433	1.88855
	39	232.239	136.982	1.6954
	40	263.51	126.242	2.08733
	41	249.036	129.905	1.91706
	42	231.344	126.382	1.83052
	43	219.395	126.024	1.7409
	44	208.475	119.176	1.74929
	45	233.596	136.085	1.71655
	46	226.838	138.631	1.63627
	47	237.871	132.564	1.79439
	48	205.189	125.781	1.63132
	49	246.087	138.349	1.77874
	50	214.456	126.992	1.68874
	51	200.42	117.234	1.70956
	52	256	129.522	1.97651
	53	224.495	125.981	1.78197
	54	271.64	118.984	2.283
	55	241.14	120.008	2.00936
	56	247.195	124.46	1.98614
	57	228.187	126.291	1.80684
	58	231.896	123.72	1.87437
	59	223.562	127.91	1.7478
	60	223.706	126.412	1.76966
	61	216.074	118.255	1.82719
	62	275.414	127.623	2.15803
	63	226.45	123.868	1.82815
	64	250.479	131.637	1.9028
	65	198.038	126.194	1.56932
	66	257.478	123.348	2.08742
	67	209.693	121.825	1.72127
	68	238.796	122.981	1.94172
	69	213.006	114.038	1.86785
	70	230.678	125.244	1.84183
	71	249.202	120.917	2.06094
	72	196.022	122.582	1.59911
	73	231.268	116.33	1.98803
	74	227.37	133.071	1.70864
	75	234.586	118.984	1.97158
	76	227.178	120.002	1.89312
	77	250.928	125.975	1.99188
	78	225.854	120.993	1.86667
	79	240.644	134.455	1.78977
	80	226.966	134.899	1.68249
	81	231.304	114.78	2.01519
	82	251.239	122.826	2.04549
	83	239.717	123.497	1.94108
	84	263.437	126.242	2.08676
	85	266.306	133.341	1.99718
	86	236.768	133.891	1.76837
	87	213.562	119.177	1.79198
	88	241.035	138.758	1.73709
	89	229.057	121.624	1.88333
	90	227.797	126.793	1.79661
	91	241.428	109.61	2.2026
	92	227.471	122.52	1.85661
	93	225.152	125.342	1.7963
	94	212.791	124.257	1.71251
	95	264.995	144.554	1.83319
	96	238.173	140.974	1.68949
	97	236.004	123.18	1.91593
	98	223.206	134.353	1.66134
	99	220.064	124.662	1.76528
	100	231.003	133.255	1.73354
	101	240.39	135.069	1.77976
	102	229.16	129.261	1.77285
	103	203.071	136.478	1.48794
	104	283.163	135.142	2.09529
	105	255.716	130.487	1.95971
	106	224.089	127.707	1.75471
	107	227.955	126.242	1.8057
	108	189.492	114.366	1.65688
	109	211.535	118.816	1.78036
	110	212.791	142.823	1.48989
	111	244.44	131.718	1.85577
	112	255.68	147.177	1.73722
	113	264.53	135.097	1.95807
	114	256.314	129.007	1.98683
	115	231.003	119.849	1.92745
		233.307	126.83	1.84259
	AVG	233.307	126.83	1.84259
	SD	20.4576	7.08866	0.165336
	N	115
